# Supplementary material
Source: publisher figshare collection journal article supplement (https://gsajournals.figshare.com/ndownloader/files/26176892)
Supplement: Supplementary file 1 [file 26176892]

## Sheet: EntropyValuesGeneIDsNCU
Table 2: Entropy values for all genes
NCU Accession	Gene ID	Entropy Value
NCU10129	gene0	0.852918
NCU09901	gene1	0.153441
NCU09903	gene2	0.856926
NCU11134	gene3	0.930988
NCU09904	gene4	1.25149
NCU09906	gene6	1.0395
NCU09907	gene7	1.61905
NCU09908	gene8	3.20356
NCU09909	gene9	1.70673
NCU09910	gene10	0.449937
NCU09911	gene11	0.445046
NCU09912	gene12	0.235308
NCU09913	gene13	5.12113
NCU09914	gene14	2.83226
NCU10501	gene15	1.31947
NCU08049	gene16	0.285024
NCU08050	gene17	0.68075
NCU08051	gene18	0.399005
NCU16303	gene19	NA
NCU08052	gene20	1.97865
NCU08053	gene21	0.197219
NCU08054	gene22	0.300249
NCU08055	gene23	0.59447
NCU08056	gene24	1.50242
NCU08057	gene25	0.801245
NCU08058	gene26	0.248803
NCU08059	gene27	1.81356
NCU08060	gene28	0.459721
NCU08062	gene29	0.203043
NCU08063	gene30	0.164604
NCU08064	gene31	0.450745
NCU08065	gene32	0.190884
NCU08066	gene33	0.227939
NCU10696	gene34	0.0878816
NCU08067	gene35	0.185727
NCU08068	gene36	0.210671
NCU08069	gene37	1.74288
NCU08070	gene38	0.300253
NCU08071	gene39	0.24294
NCU08072	gene41	0.226106
NCU08073	gene42	1.92605
NCU08074	gene43	2.80651
NCU08075	gene44	2.35979
NCU08076	gene45	0.593336
NCU08077	gene46	2.22597
NCU08078	gene47	3.52062
NCU08079	gene48	2.76516
NCU08080	gene49	4.09767
NCU16305	gene50	3.71514
NCU08081	gene51	3.38871
NCU08083	gene52	3.55201
NCU08084	gene53	3.42042
NCU08085	gene54	2.87082
NCU08086	gene55	3.19594
NCU08087	gene56	1.64304
NCU08089	gene57	3.64511
NCU16306	gene58	0.755601
NCU08090	gene59	0.643514
NCU10622	gene60	0.760385
NCU08091	gene61	0.523937
NCU08092	gene62	0.514895
NCU08093	gene63	0.0899148
NCU08094	gene64	0.507663
NCU08095	gene65	2.27592
NCU08096	gene66	2.44353
NCU16307	gene67	2.02456
NCU08097	gene68	2.44498
NCU08098	gene69	0.558832
NCU08099	gene70	0.847769
NCU08100	gene71	0.945349
NCU08101	gene72	2.58536
NCU08102	gene75	2.23379
NCU08103	gene76	2.24955
NCU08105	gene77	2.80314
NCU08106	gene78	2.85956
NCU08107	gene79	3.2729
NCU08109	gene80	3.00702
NCU08110	gene81	0.171128
NCU08111	gene82	0.18434
NCU08112	gene83	0.17474
NCU08113	gene84	1.82976
NCU08114	gene85	1.9527
NCU08115	gene86	0.852539
NCU08116	gene87	1.25038
NCU08117	gene88	1.55415
NCU08118	gene89	0.19202
NCU08119	gene90	0.200232
NCU08120	gene91	0.589399
NCU08121	gene92	1.03074
NCU10647	gene93	0.281443
NCU16310	gene94	2.60735
NCU07509	gene95	0.368352
NCU07508	gene96	3.23446
NCU16311	gene97	0.611386
NCU07507	gene98	0.256893
NCU07506	gene99	0.377865
NCU07505	gene100	0.161738
NCU07504	gene101	0.132946
NCU07503	gene102	0.780104
NCU07502	gene103	0.261095
NCU07501	gene105	2.34974
NCU07500	gene106	2.63643
NCU07499	gene107	1.25047
NCU07498	gene108	0.467924
NCU07497	gene109	0.354604
NCU07496	gene110	0.250191
NCU07495	gene111	0.354653
NCU07494	gene113	0.200459
NCU07493	gene114	0.214242
NCU07492	gene115	0.267791
NCU07491	gene116	0.682455
NCU07489	gene117	0.185013
NCU16314	gene118	NA
NCU07487	gene120	2.14657
NCU07486	gene121	0.919403
NCU07485	gene122	1.09681
NCU07484	gene123	1.52643
NCU07483	gene124	0.15785
NCU07482	gene125	0.283395
NCU07481	gene126	0.297746
NCU07480	gene127	2.70629
NCU07479	gene128	1.1849
NCU07478	gene129	0.28705
NCU07477	gene130	1.53131
NCU07476	gene131	0.437409
NCU07475	gene132	4.46778
NCU07474	gene133	1.31991
NCU07473	gene134	0.530242
NCU07472	gene135	0.214535
NCU07471	gene136	0.213563
NCU07468	gene137	0.144753
NCU07467	gene138	0.575442
NCU07466	gene139	0.193749
NCU07465	gene140	0.359103
NCU07464	gene141	1.09748
NCU07463	gene142	1.02443
NCU07462	gene143	3.77134
NCU07461	gene144	0.558593
NCU07460	gene145	0.207705
NCU07459	gene146	0.490544
NCU16316	gene147	0.317597
NCU07458	gene148	0.267619
NCU07457	gene149	0.237295
NCU07456	gene150	0.275836
NCU07455	gene151	0.423024
NCU07454	gene152	0.470153
NCU07453	gene153	0.628712
NCU07452	gene154	3.40208
NCU07451	gene155	0.216028
NCU07450	gene156	0.500847
NCU07449	gene157	3.13809
NCU07448	gene158	1.99192
NCU07447	gene159	0.379887
NCU07446	gene160	0.181784
NCU07445	gene161	0.158998
NCU07443	gene162	0.244225
NCU07442	gene163	0.302101
NCU07441	gene164	1.80265
NCU07440	gene165	0.261855
NCU07439	gene166	0.498215
NCU07438	gene167	0.11221
NCU07437	gene168	0.160858
NCU07436	gene169	0.197122
NCU07435	gene170	0.140586
NCU07434	gene171	1.14238
NCU07433	gene172	2.25407
NCU07432	gene174	0.32384
NCU07430	gene175	0.150984
NCU07429	gene176	1.9103
NCU07428	gene177	1.29654
NCU07427	gene178	0.946432
NCU10006	gene179	0.507894
NCU10007	gene180	1.33129
NCU10008	gene181	0.457032
NCU09064	gene182	1.41886
NCU09065	gene183	0.112466
NCU09066	gene184	0.616251
NCU09068	gene185	0.20232
NCU09069	gene186	0.736913
NCU09070	gene187	0.170502
NCU09071	gene188	0.23154
NCU09072	gene189	2.6393
NCU10839	gene190	2.33453
NCU09073	gene191	0.339272
NCU09074	gene192	2.43661
NCU09075	gene193	2.1573
NCU09076	gene194	0.161063
NCU09077	gene195	0.171125
NCU09078	gene196	0.362036
NCU09079	gene197	0.187611
NCU09080	gene198	2.6572
NCU09081	gene199	2.92253
NCU09082	gene200	2.55936
NCU09084	gene201	1.58181
NCU09085	gene203	0.487059
NCU16318	gene204	0.500719
NCU09087	gene205	0.578715
NCU09088	gene206	0.393061
NCU09089	gene207	0.376036
NCU09090	gene208	0.169378
NCU09091	gene209	0.444244
NCU09092	gene210	0.251949
NCU09093	gene211	1.8841
NCU09094	gene212	1.05557
NCU09095	gene213	0.0892599
NCU09096	gene214	0.519959
NCU09097	gene215	0.49737
NCU09098	gene217	0.336669
NCU09099	gene218	2.82563
NCU09100	gene219	0.158229
NCU09101	gene220	0.465496
NCU09102	gene221	0.296181
NCU09103	gene222	1.91232
NCU09104	gene223	0.359772
NCU16320	gene224	0.583736
NCU02187	gene225	0.255958
NCU02184	gene227	1.35014
NCU02183	gene228	1.78566
NCU02182	gene229	0.285387
NCU02181	gene230	0.478917
NCU02179	gene232	1.06021
NCU02178	gene233	2.90187
NCU16321	gene234	1.81288
NCU02177	gene235	0.12649
NCU02176	gene236	0.147462
NCU16323	gene238	0.582065
NCU02175	gene239	1.09347
NCU16325	gene241	0.940845
NCU02174	gene242	1.65625
NCU02173	gene243	0.194197
NCU02172	gene245	0.428748
NCU02171	gene246	0.503155
NCU02170	gene247	3.24933
NCU02169	gene248	0.640522
NCU02168	gene249	0.148494
NCU02167	gene250	0.231725
NCU16327	gene251	0.475018
NCU02165	gene252	0.711004
NCU02164	gene253	0.636756
NCU02163	gene254	1.78145
NCU02162	gene255	0.184438
NCU02161	gene256	0.184337
NCU02160	gene257	0.136292
NCU02159	gene258	0.594317
NCU02158	gene259	0.215836
NCU02157	gene260	0.359734
NCU02156	gene261	0.111089
NCU02155	gene262	1.28771
NCU16328	gene263	0.540524
NCU16329	gene264	0.420478
NCU02153	gene265	0.203821
NCU02152	gene266	0.127765
NCU02151	gene267	0.263038
NCU02150	gene268	0.511549
NCU02149	gene269	0.172666
NCU02148	gene270	0.251245
NCU16330	gene271	0.151217
NCU02147	gene272	0.39639
NCU02146	gene273	1.3451
NCU02145	gene274	0.889854
NCU10687	gene275	1.37321
NCU02144	gene276	0.936173
NCU02143	gene277	2.60929
NCU02142	gene278	1.45856
NCU02139	gene279	0.508476
NCU02138	gene280	0.681011
NCU02137	gene281	0.133613
NCU02136	gene282	0.195023
NCU02134	gene283	0.374531
NCU02133	gene284	0.259698
NCU02132	gene285	0.870432
NCU02131	gene286	0.268247
NCU02130	gene287	0.680594
NCU02129	gene288	0.785376
NCU02128	gene289	0.792165
NCU02127	gene290	1.74825
NCU02126	gene291	1.91711
NCU02125	gene292	1.92078
NCU02124	gene293	0.515521
NCU02123	gene295	0.1931
NCU02122	gene296	0.825742
NCU02121	gene297	0.267975
NCU10232	gene298	0.176709
NCU02120	gene299	0.33056
NCU02119	gene300	0.22311
NCU02118	gene301	0.27036
NCU02117	gene302	0.180895
NCU02116	gene303	0.331702
NCU02115	gene304	0.21423
NCU02114	gene305	0.213398
NCU16332	gene306	NA
NCU02113	gene307	0.0965274
NCU02112	gene308	0.299954
NCU02111	gene309	0.207644
NCU02110	gene310	0.280706
NCU02109	gene311	0.366872
NCU02108	gene312	0.231293
NCU02107	gene313	0.421828
NCU02106	gene314	0.42297
NCU02105	gene315	0.165939
NCU02104	gene316	0.152232
NCU02103	gene317	0.167841
NCU11212	gene318	0.353249
NCU11211	gene319	1.1706
NCU16333	gene320	0.545152
NCU02101	gene321	0.239106
NCU02100	gene322	0.639293
NCU11041	gene323	0.329425
NCU02099	gene324	0.439953
NCU02098	gene325	0.53121
NCU02097	gene326	1.51083
NCU02096	gene327	0.448168
NCU02095	gene328	0.211828
NCU02094	gene330	0.275647
NCU02092	gene331	0.575564
NCU02091	gene332	0.309497
NCU02090	gene333	0.26437
NCU16334	gene334	0.788926
NCU02089	gene335	0.405426
NCU02088	gene336	1.88152
NCU02087	gene337	3.31082
NCU02086	gene339	0.626835
NCU10903	gene340	0.840258
NCU02085	gene341	1.7958
NCU02084	gene342	0.629114
NCU02083	gene343	0.48805
NCU02082	gene344	0.13872
NCU02081	gene346	0.801288
NCU11210	gene347	1.3007
NCU02080	gene348	0.923391
NCU02079	gene349	0.0755952
NCU02078	gene350	0.127349
NCU02077	gene351	1.20041
NCU02076	gene352	0.188482
NCU02075	gene353	0.727986
NCU02074	gene354	0.876608
NCU02073	gene355	0.353827
NCU02071	gene356	1.02123
NCU02070	gene357	0.193079
NCU16336	gene358	0.268831
NCU16337	gene359	0.216411
NCU02068	gene360	0.267269
NCU02067	gene361	0.249817
NCU11209	gene362	0.252674
NCU02066	gene363	0.745655
NCU02065	gene364	0.351442
NCU02064	gene365	0.163945
NCU02063	gene366	0.165714
NCU02062	gene367	1.9465
NCU02061	gene368	0.462252
NCU02060	gene369	0.481386
NCU02059	gene370	0.48985
NCU02058	gene371	0.193118
NCU02057	gene372	0.316185
NCU02056	gene373	0.513432
NCU02055	gene374	0.150117
NCU02054	gene375	0.100672
NCU02053	gene376	0.290294
NCU02052	gene377	0.281978
NCU10806	gene378	0.224696
NCU02051	gene379	0.581123
NCU02049	gene381	0.334743
NCU02048	gene382	0.13686
NCU02046	gene383	0.726354
NCU02044	gene384	0.182062
NCU02043	gene385	0.228708
NCU02042	gene387	0.13482
NCU02041	gene388	0.146521
NCU02040	gene389	1.34859
NCU02039	gene390	0.280638
NCU02038	gene391	0.279483
NCU02037	gene392	3.4892
NCU02036	gene394	0.250385
NCU02035	gene395	0.467457
NCU02034	gene396	2.28655
NCU02033	gene397	0.264517
NCU02032	gene398	3.29928
NCU02031	gene399	1.04509
NCU02030	gene400	1.88278
NCU02029	gene401	2.42547
NCU02028	gene402	0.207771
NCU02027	gene403	0.352235
NCU02026	gene404	0.264414
NCU02025	gene405	0.0702276
NCU02024	gene406	0.150625
NCU02023	gene407	2.61158
NCU02022	gene408	0.320461
NCU02021	gene409	2.8626
NCU02020	gene410	0.229922
NCU02019	gene411	1.46214
NCU02018	gene412	0.170781
NCU02017	gene413	0.142843
NCU02016	gene414	0.164035
NCU02015	gene415	0.233125
NCU02014	gene416	0.176686
NCU02013	gene417	0.198154
NCU02012	gene418	0.131097
NCU02011	gene419	0.143458
NCU02010	gene420	1.16159
NCU02009	gene421	0.828839
NCU02008	gene422	0.267441
NCU02007	gene423	0.167807
NCU02006	gene424	0.121761
NCU02005	gene425	0.521436
NCU02004	gene426	0.0794477
NCU02003	gene427	0.204265
NCU02002	gene428	0.639774
NCU02001	gene429	0.0857427
NCU02000	gene430	0.126475
NCU01999	gene431	0.172185
NCU01998	gene432	0.366193
NCU01997	gene433	0.268145
NCU01996	gene435	0.354775
NCU01995	gene436	3.00133
NCU01994	gene437	0.150375
NCU01993	gene438	0.349482
NCU01992	gene439	0.166041
NCU01991	gene440	0.130502
NCU01990	gene441	0.130348
NCU01989	gene442	0.52075
NCU01988	gene443	3.38349
NCU01987	gene444	3.36766
NCU16341	gene445	3.12762
NCU01985	gene446	0.732892
NCU01984	gene447	0.186855
NCU01983	gene448	0.392678
NCU01982	gene449	0.24123
NCU01981	gene450	0.0895244
NCU01980	gene451	0.264362
NCU01979	gene452	0.740421
NCU01978	gene453	0.337112
NCU01977	gene454	0.330482
NCU01976	gene455	0.326115
NCU01975	gene457	0.10984
NCU01974	gene458	0.11065
NCU01973	gene459	0.600227
NCU01972	gene460	1.52951
NCU01971	gene461	0.169619
NCU01970	gene462	0.927238
NCU01969	gene463	0.199212
NCU01968	gene464	0.565862
NCU01967	gene465	0.156589
NCU01966	gene466	0.467355
NCU01965	gene467	0.344723
NCU01964	gene468	0.331779
NCU01963	gene469	0.207553
NCU01962	gene470	0.153134
NCU01961	gene471	0.401086
NCU01960	gene472	1.42395
NCU01959	gene473	1.66239
NCU01958	gene474	1.17601
NCU01957	gene476	1.01672
NCU01956	gene477	0.175283
NCU01955	gene478	0.244455
NCU01954	gene480	0.123555
NCU01953	gene481	0.294791
NCU01951	gene482	0.237821
NCU01950	gene483	0.139974
NCU01949	gene484	0.475478
NCU01948	gene485	0.506
NCU01947	gene486	0.309271
NCU01946	gene487	0.523621
NCU01945	gene488	0.430955
NCU01944	gene489	0.423115
NCU01943	gene490	2.69937
NCU01942	gene491	0.430534
NCU01940	gene492	0.247517
NCU01939	gene493	0.184834
NCU01938	gene494	0.287076
NCU01936	gene496	0.131717
NCU16343	gene497	0.394661
NCU01935	gene498	0.143135
NCU01932	gene500	0.146918
NCU16344	gene501	0.916797
NCU01931	gene502	0.400905
NCU01930	gene503	0.115287
NCU01929	gene504	0.122934
NCU01928	gene505	0.338917
NCU01927	gene506	0.196705
NCU01926	gene508	0.969026
NCU01924	gene509	0.195121
NCU01923	gene510	0.816883
NCU01922	gene511	0.22606
NCU11201	gene512	0.874599
NCU16346	gene514	0.473778
NCU11200	gene515	0.402236
NCU01920	gene516	0.151362
NCU01919	gene517	0.206649
NCU01918	gene518	0.104469
NCU01917	gene519	0.825187
NCU01916	gene520	0.825693
NCU01914	gene521	0.0957148
NCU01913	gene522	0.0897652
NCU01912	gene523	0.323122
NCU01911	gene524	0.325553
NCU01910	gene525	0.357974
NCU01908	gene526	0.170176
NCU01907	gene527	0.177722
NCU01906	gene528	1.16566
NCU01905	gene529	1.01081
NCU01904	gene530	0.629727
NCU01903	gene531	1.09284
NCU16347	gene532	0.60587
NCU01902	gene533	0.199458
NCU01901	gene534	0.48665
NCU01900	gene535	2.21422
NCU01899	gene536	1.37877
NCU16348	gene537	0.926652
NCU01898	gene538	0.985277
NCU01897	gene539	0.390135
NCU01896	gene540	0.620396
NCU01895	gene541	0.216053
NCU01894	gene542	0.404151
NCU01893	gene543	0.723559
NCU01891	gene544	0.665079
NCU01889	gene546	0.250609
NCU01888	gene547	0.489794
NCU01886	gene548	0.276794
NCU10570	gene549	1.04926
NCU01884	gene550	0.199825
NCU01883	gene551	0.365997
NCU01882	gene552	0.608951
NCU16349	gene553	1.04375
NCU01881	gene554	0.781331
NCU01880	gene555	0.821314
NCU01879	gene556	0.256589
NCU01878	gene557	0.235772
NCU01877	gene558	2.53074
NCU01876	gene559	3.16107
NCU01875	gene560	3.21285
NCU01874	gene561	1.01651
NCU16350	gene562	2.13374
NCU01873	gene563	1.55068
NCU01872	gene564	1.1967
NCU01871	gene565	0.921502
NCU01870	gene566	1.09913
NCU01869	gene567	2.27638
NCU01868	gene568	0.887934
NCU01867	gene569	0.796452
NCU01866	gene570	1.90984
NCU01865	gene571	0.373821
NCU16352	gene574	0.498318
NCU01863	gene575	1.30607
NCU01862	gene576	0.81055
NCU01861	gene577	1.17162
NCU01860	gene578	0.84321
NCU01859	gene579	0.156746
NCU01858	gene580	0.167741
NCU01857	gene581	0.207451
NCU01856	gene582	0.251488
NCU16353	gene583	0.568934
NCU01855	gene584	1.05806
NCU01854	gene585	0.111639
NCU01853	gene586	1.69585
NCU01852	gene587	0.402053
NCU01851	gene588	0.256802
NCU01850	gene589	0.154376
NCU01849	gene590	4.57975
NCU01848	gene591	2.0462
NCU09970	gene593	0.809078
NCU09971	gene594	0.807112
NCU09972	gene596	0.247406
NCU09973	gene597	0.219407
NCU09974	gene598	0.621078
NCU09975	gene599	1.9566
NCU09976	gene600	1.36822
NCU09977	gene601	0.847124
NCU09978	gene602	0.919992
NCU09980	gene604	0.206171
NCU09981	gene605	3.51643
NCU09982	gene606	0.134839
NCU02463	gene607	0.320688
NCU02464	gene608	0.149214
NCU02465	gene609	1.18359
NCU02466	gene610	0.253743
NCU02467	gene611	0.130217
NCU02468	gene612	0.152384
NCU02470	gene613	0.747867
NCU16357	gene614	2.60379
NCU02472	gene615	0.19158
NCU02473	gene616	0.140833
NCU02474	gene617	0.385621
NCU02475	gene618	0.434026
NCU02476	gene619	0.149696
NCU02477	gene620	0.625433
NCU02478	gene622	0.985941
NCU02479	gene623	0.397945
NCU02480	gene624	0.489472
NCU02481	gene625	1.51486
NCU02482	gene626	1.65573
NCU02483	gene627	0.778479
NCU02485	gene628	1.14887
NCU02486	gene629	2.3645
NCU02487	gene630	2.05677
NCU02488	gene631	0.609095
NCU10933	gene632	0.256088
NCU10932	gene633	3.1316
NCU02490	gene634	0.207037
NCU02491	gene636	0.406569
NCU02492	gene637	0.39812
NCU02493	gene638	0.20755
NCU02494	gene639	0.537624
NCU02495	gene640	0.101148
NCU02496	gene641	0.202971
NCU02497	gene642	0.663704
NCU02498	gene643	0.136077
NCU02499	gene644	0.288367
NCU02500	gene645	1.74179
NCU02501	gene646	1.34233
NCU02502	gene647	1.24525
NCU02503	gene649	2.62581
NCU02504	gene650	0.28615
NCU02505	gene651	0.174783
NCU02507	gene652	0.317259
NCU02508	gene653	0.106876
NCU02509	gene654	0.469751
NCU02510	gene655	0.181186
NCU02511	gene656	0.778602
NCU02512	gene657	1.06807
NCU02513	gene658	0.547557
NCU02514	gene659	0.210238
NCU16361	gene660	0.248845
NCU02515	gene661	0.30289
NCU02516	gene662	1.66042
NCU16362	gene663	2.43562
NCU02517	gene664	0.525919
NCU11237	gene665	0.560953
NCU11236	gene666	0.396047
NCU02519	gene667	0.202322
NCU02520	gene668	0.146316
NCU02521	gene669	1.30966
NCU02522	gene670	0.302605
NCU02523	gene671	0.507239
NCU02524	gene672	0.432819
NCU02525	gene673	0.246576
NCU02526	gene674	0.862598
NCU16363	gene675	1.35508
NCU02527	gene676	0.909749
NCU02528	gene677	0.694907
NCU02529	gene678	0.193407
NCU02530	gene679	0.580266
NCU02531	gene680	0.121618
NCU02532	gene681	0.111878
NCU02533	gene682	0.825674
NCU02534	gene683	0.24109
NCU02535	gene684	0.925577
NCU02536	gene685	0.172332
NCU16364	gene686	0.385663
NCU11235	gene687	0.113758
NCU11234	gene688	0.954974
NCU02538	gene689	0.139791
NCU02539	gene690	0.29786
NCU02540	gene691	0.570114
NCU02541	gene692	0.186152
NCU02542	gene693	0.279227
NCU02543	gene694	4.19013
NCU02544	gene695	0.433001
NCU02545	gene696	2.05677
NCU02546	gene697	0.915908
NCU02547	gene698	0.367367
NCU02548	gene699	0.163627
NCU02549	gene700	0.452604
NCU02550	gene701	0.580822
NCU16366	gene703	0.761219
NCU02552	gene704	0.268245
NCU02553	gene705	0.0756786
NCU02554	gene706	0.300007
NCU02555	gene707	0.114206
NCU16367	gene708	0.169835
NCU16368	gene709	0.386709
NCU02556	gene710	0.210109
NCU02558	gene711	0.468469
NCU02559	gene712	0.157725
NCU02560	gene713	0.406844
NCU02561	gene714	0.168766
NCU02562	gene715	2.62138
NCU02563	gene716	0.115958
NCU02564	gene717	0.163705
NCU02565	gene718	0.118647
NCU02566	gene719	0.387722
NCU02567	gene720	0.454233
NCU02568	gene721	1.06249
NCU10788	gene722	0.204983
NCU10789	gene723	0.247623
NCU02570	gene724	0.273555
NCU02571	gene725	0.279896
NCU02572	gene726	0.096188
NCU02573	gene727	0.0997436
NCU02574	gene728	0.630883
NCU02575	gene729	1.04923
NCU02576	gene730	0.152311
NCU02577	gene731	0.154604
NCU02578	gene732	0.131966
NCU02579	gene733	1.05686
NCU02580	gene734	1.1532
NCU02582	gene735	0.321347
NCU02583	gene736	1.02192
NCU02584	gene737	2.19994
NCU02585	gene738	0.130402
NCU02586	gene739	0.127973
NCU02587	gene740	0.193551
NCU02588	gene741	0.123497
NCU02589	gene742	0.22841
NCU02590	gene743	0.364472
NCU02591	gene744	0.142211
NCU02592	gene745	0.186549
NCU02593	gene747	1.5268
NCU02594	gene748	0.574267
NCU02595	gene749	0.201548
NCU02596	gene750	0.538608
NCU02597	gene751	0.561076
NCU02598	gene752	0.263095
NCU02599	gene753	0.164944
NCU02600	gene754	2.74314
NCU02601	gene755	0.229153
NCU02602	gene756	0.155989
NCU02603	gene757	0.768123
NCU02604	gene758	0.70105
NCU02605	gene759	0.337619
NCU02606	gene760	0.281595
NCU02607	gene761	4.28847
NCU02608	gene762	0.280222
NCU02609	gene763	0.404734
NCU02610	gene764	0.0649418
NCU02611	gene765	0.823987
NCU02612	gene766	0.443815
NCU02613	gene767	1.35426
NCU02614	gene768	0.112155
NCU02615	gene769	0.0951454
NCU02616	gene770	0.207286
NCU02617	gene771	0.126395
NCU02618	gene772	0.101105
NCU02619	gene773	0.351541
NCU02620	gene774	0.0947252
NCU02621	gene775	0.184445
NCU02622	gene776	0.608465
NCU02623	gene777	0.659147
NCU02624	gene778	0.526103
NCU02625	gene779	0.445489
NCU02626	gene780	0.213685
NCU02627	gene781	0.939945
NCU02628	gene782	0.860706
NCU02629	gene783	0.650022
NCU02630	gene784	1.03808
NCU02631	gene785	0.121724
NCU02632	gene786	0.280699
NCU02633	gene787	0.161996
NCU02634	gene788	0.119387
NCU02635	gene789	0.0906292
NCU02636	gene790	0.191781
NCU02637	gene791	0.140793
NCU02638	gene792	0.560715
NCU02639	gene794	0.46173
NCU02640	gene795	0.622432
NCU02641	gene796	0.20517
NCU02643	gene798	0.732048
NCU02644	gene799	0.137783
NCU10075	gene800	0.283472
NCU10076	gene801	NA
NCU02648	gene802	0.848694
NCU02650	gene803	0.212695
NCU02651	gene804	0.302
NCU02652	gene805	0.58039
NCU02653	gene806	1.79378
NCU02654	gene807	1.00067
NCU02655	gene808	2.97571
NCU02656	gene809	0.604894
NCU02657	gene810	0.794527
NCU02658	gene811	0.185483
NCU02659	gene812	0.244101
NCU02660	gene813	0.345731
NCU02661	gene814	0.0627164
NCU16370	gene815	1.98708
NCU02663	gene816	1.71336
NCU02664	gene817	0.254942
NCU02665	gene818	0.491283
NCU02666	gene819	0.163461
NCU16371	gene820	0.597902
NCU02668	gene821	0.282521
NCU02669	gene822	0.227981
NCU02670	gene823	0.0956609
NCU02671	gene824	0.221879
NCU02672	gene826	0.538858
NCU02673	gene827	0.695655
NCU16372	gene828	0.541343
NCU02674	gene829	0.340516
NCU02675	gene830	2.60108
NCU02676	gene831	0.138285
NCU02677	gene832	1.46192
NCU02678	gene833	0.213016
NCU02679	gene834	0.547188
NCU02680	gene835	0.155318
NCU02681	gene837	0.341299
NCU02682	gene838	0.667714
NCU02683	gene839	0.0976722
NCU06306	gene840	0.105253
NCU02685	gene841	0.203624
NCU02686	gene842	0.369845
NCU02687	gene843	0.163468
NCU02688	gene844	0.23433
NCU02689	gene845	0.191738
NCU02690	gene846	0.543246
NCU02691	gene847	0.326624
NCU02692	gene848	0.231117
NCU02693	gene849	0.142814
NCU02694	gene850	1.08969
NCU02695	gene851	0.119705
NCU02696	gene852	0.130324
NCU02697	gene853	0.263563
NCU02698	gene854	1.46201
NCU02699	gene855	0.440388
NCU02700	gene856	1.35174
NCU02701	gene857	0.457431
NCU02702	gene858	0.713429
NCU02703	gene859	0.823066
NCU02704	gene860	2.1314
NCU02705	gene861	0.368411
NCU02706	gene862	0.134623
NCU02707	gene863	0.4412
NCU10498	gene864	0.499089
NCU10497	gene865	0.244669
NCU02710	gene866	1.81596
NCU02711	gene867	0.647786
NCU02712	gene868	0.632467
NCU02713	gene869	0.597876
NCU02716	gene870	0.0852059
NCU02717	gene871	0.0566151
NCU02718	gene872	0.280103
NCU02719	gene873	0.19898
NCU02720	gene874	0.446422
NCU02721	gene875	3.1914
NCU02722	gene876	1.37613
NCU02723	gene877	0.167555
NCU02724	gene879	0.319904
NCU02725	gene880	0.224468
NCU02726	gene881	0.333735
NCU02727	gene882	0.833731
NCU02728	gene883	0.117251
NCU02729	gene884	0.79324
NCU02730	gene885	0.317504
NCU02731	gene886	0.263359
NCU02732	gene887	0.433236
NCU02733	gene888	0.190615
NCU02734	gene889	0.194561
NCU02735	gene890	1.91394
NCU02736	gene891	0.185389
NCU02737	gene892	0.133369
NCU02738	gene893	0.0887576
NCU02739	gene894	0.454032
NCU02740	gene895	2.529
NCU02741	gene896	0.151367
NCU02742	gene897	0.151055
NCU02743	gene898	0.142884
NCU02744	gene899	0.520214
NCU02745	gene900	0.23392
NCU02746	gene901	0.238352
NCU16374	gene902	0.464204
NCU02747	gene903	0.205033
NCU02748	gene904	0.233401
NCU02749	gene905	0.156388
NCU02750	gene906	0.452011
NCU02751	gene907	0.394865
NCU02752	gene908	0.358005
NCU02753	gene909	0.0954548
NCU11228	gene910	0.119463
NCU02754	gene911	0.0894105
NCU02755	gene912	0.162032
NCU02757	gene913	0.295909
NCU02758	gene914	0.190979
NCU16375	gene915	0.207283
NCU02759	gene916	0.412052
NCU02761	gene917	0.723109
NCU02762	gene918	0.241907
NCU09388	gene919	0.160595
NCU09387	gene920	0.302613
NCU09386	gene921	0.0997175
NCU09384	gene922	0.91142
NCU09383	gene923	0.18862
NCU09382	gene924	2.88248
NCU09381	gene925	0.121909
NCU09380	gene926	0.837167
NCU09379	gene927	2.57356
NCU09378	gene928	0.0601204
NCU09377	gene929	0.120011
NCU09376	gene930	0.350298
NCU09375	gene931	0.19078
NCU09374	gene932	0.322313
NCU09373	gene933	3.50856
NCU09372	gene934	1.44405
NCU09371	gene935	0.249441
NCU09370	gene936	0.122378
NCU09368	gene937	0.207609
NCU09367	gene938	0.162389
NCU09366	gene939	0.214182
NCU16376	gene940	0.465627
NCU09365	gene941	0.962907
NCU09364	gene942	2.21139
NCU10352	gene943	0.0691011
NCU09363	gene944	0.388764
NCU09362	gene945	0.416138
NCU09360	gene946	0.128903
NCU09999	gene947	0.190701
NCU09998	gene948	0.272839
NCU09996	gene949	0.189442
NCU09995	gene950	0.170064
NCU09994	gene951	0.31027
NCU10058	gene952	0.222983
NCU16377	gene953	0.210717
NCU10059	gene954	0.383952
NCU08578	gene955	0.0657064
NCU08579	gene956	1.1352
NCU08585	gene957	6.59991
NCU09892	gene958	0.23935
NCU09894	gene959	0.269077
NCU09895	gene960	0.178778
NCU09896	gene961	0.647842
NCU09897	gene962	0.169379
NCU09898	gene963	0.215903
NCU09899	gene964	0.195222
NCU09900	gene965	0.0779145
NCU10073	gene966	0.117244
NCU09802	gene967	0.368498
NCU09803	gene968	0.180367
NCU09804	gene969	0.643858
NCU09805	gene970	0.849361
NCU09806	gene971	0.296986
NCU09807	gene972	0.310119
NCU09808	gene973	0.137641
NCU09809	gene974	0.187732
NCU09810	gene975	0.745361
NCU09811	gene976	0.277593
NCU09812	gene977	0.25133
NCU09813	gene978	0.102837
NCU16378	gene979	0.98042
NCU09814	gene980	0.1364
NCU16379	gene981	0.739632
NCU09815	gene982	0.352239
NCU09816	gene983	0.417861
NCU09817	gene984	0.63862
NCU09818	gene985	0.168149
NCU09819	gene986	0.0919479
NCU09820	gene987	1.06845
NCU09821	gene988	0.605793
NCU16380	gene989	0.456486
NCU09333	gene990	0.343415
NCU09332	gene992	0.255852
NCU09331	gene993	0.169974
NCU09330	gene994	0.350974
NCU09329	gene995	0.17755
NCU09328	gene996	1.21858
NCU09327	gene997	0.25463
NCU16381	gene998	1.15999
NCU09326	gene999	0.432939
NCU09325	gene1000	0.391908
NCU09324	gene1001	0.19477
NCU09323	gene1002	0.592723
NCU16382	gene1003	1.13386
NCU09322	gene1004	0.242922
NCU09321	gene1005	0.810746
NCU09320	gene1006	0.370552
NCU09319	gene1007	0.101418
NCU09318	gene1008	0.301205
NCU09317	gene1009	0.234366
NCU09316	gene1010	0.290892
NCU09315	gene1011	0.140002
NCU09314	gene1012	3.16482
NCU09313	gene1013	0.134065
NCU09312	gene1014	0.138784
NCU09311	gene1015	0.139748
NCU09310	gene1016	0.188154
NCU09309	gene1017	0.161342
NCU09308	gene1018	1.42918
NCU09307	gene1019	0.553771
NCU10069	gene1020	0.304993
NCU03055	gene1021	0.0829607
NCU10601	gene1022	3.26349
NCU03056	gene1023	0.348324
NCU03057	gene1024	0.14941
NCU03058	gene1025	0.149198
NCU03059	gene1026	0.159682
NCU10337	gene1027	0.213849
NCU03061	gene1028	0.287461
NCU03062	gene1029	0.109228
NCU03063	gene1030	0.19272
NCU03064	gene1031	0.569275
NCU03065	gene1032	0.182483
NCU03066	gene1033	1.02943
NCU03067	gene1034	0.381847
NCU03068	gene1035	0.293754
NCU03070	gene1036	0.285493
NCU03071	gene1037	0.221545
NCU03072	gene1038	0.172041
NCU03073	gene1039	0.243031
NCU03074	gene1040	0.369582
NCU03076	gene1041	0.751272
NCU03077	gene1042	0.357978
NCU03078	gene1043	1.20747
NCU03079	gene1045	0.674223
NCU03080	gene1046	0.383182
NCU03081	gene1047	0.15273
NCU03082	gene1048	0.477872
NCU16384	gene1049	0.440041
NCU03083	gene1050	0.425874
NCU03084	gene1051	0.21733
NCU03085	gene1052	0.11503
NCU03086	gene1053	0.407743
NCU16385	gene1054	0.197136
NCU03087	gene1055	0.173939
NCU10595	gene1056	2.57357
NCU03088	gene1057	0.206521
NCU03089	gene1058	0.152817
NCU16386	gene1059	0.628411
NCU03091	gene1060	0.459303
NCU03092	gene1061	1.53788
NCU03093	gene1062	0.23163
NCU03094	gene1063	0.286512
NCU03095	gene1064	0.0903562
NCU03096	gene1065	0.156156
NCU03097	gene1066	0.190253
NCU03098	gene1067	1.54337
NCU03099	gene1068	0.0951076
NCU03100	gene1069	0.137435
NCU03101	gene1070	0.166668
NCU03102	gene1071	0.486764
NCU03103	gene1072	0.227943
NCU03104	gene1073	3.72052
NCU03105	gene1074	0.395
NCU03106	gene1075	0.457366
NCU03107	gene1076	0.648445
NCU03108	gene1077	0.332415
NCU03109	gene1078	0.85098
NCU03110	gene1079	0.188913
NCU03111	gene1080	0.19605
NCU03112	gene1081	0.21962
NCU03113	gene1082	0.143028
NCU03114	gene1083	0.129042
NCU03115	gene1084	0.14142
NCU03116	gene1085	0.226198
NCU03117	gene1086	0.766377
NCU03118	gene1087	0.483548
NCU03120	gene1088	0.201435
NCU03121	gene1089	1.90112
NCU03122	gene1090	0.33609
NCU03123	gene1091	0.210396
NCU03124	gene1092	0.0997923
NCU03125	gene1093	0.300638
NCU03126	gene1094	0.200441
NCU03127	gene1095	0.254403
NCU03128	gene1096	0.254716
NCU03129	gene1097	0.0591482
NCU03130	gene1098	0.15508
NCU07807	gene1099	0.367509
NCU03132	gene1100	0.472988
NCU03133	gene1101	0.552327
NCU03134	gene1102	0.477044
NCU03135	gene1103	0.135266
NCU03136	gene1104	0.252902
NCU03137	gene1105	0.308612
NCU03138	gene1106	0.0983412
NCU03139	gene1107	0.285035
NCU03140	gene1108	2.09196
NCU03141	gene1109	0.258172
NCU03142	gene1110	0.708612
NCU10470	gene1111	3.00563
NCU03145	gene1112	0.103879
NCU03146	gene1113	0.392619
NCU03147	gene1114	0.137533
NCU03148	gene1115	0.304001
NCU03149	gene1116	0.119129
NCU03150	gene1117	0.372827
NCU03151	gene1118	0.780047
NCU03152	gene1119	0.47051
NCU16387	gene1120	1.48426
NCU03153	gene1121	0.966486
NCU03154	gene1122	0.206646
NCU03155	gene1123	0.107945
NCU03156	gene1124	0.212576
NCU03157	gene1125	0.403947
NCU03158	gene1126	0.24415
NCU03159	gene1127	0.171586
NCU03160	gene1128	0.248354
NCU03161	gene1129	3.71372
NCU03162	gene1130	2.89976
NCU03163	gene1131	3.09155
NCU03164	gene1132	0.326729
NCU03165	gene1133	0.924996
NCU03166	gene1134	0.324518
NCU03167	gene1135	0.444752
NCU03168	gene1136	0.204509
NCU03169	gene1137	0.13096
NCU03170	gene1138	0.223308
NCU03171	gene1139	0.843877
NCU03172	gene1140	0.866969
NCU03173	gene1141	0.351382
NCU03174	gene1142	0.196826
NCU03175	gene1144	0.122581
NCU03176	gene1145	0.510364
NCU03177	gene1146	0.338545
NCU03178	gene1147	0.113202
NCU03179	gene1148	0.333654
NCU03180	gene1149	0.494438
NCU03181	gene1150	1.71531
NCU03182	gene1151	1.09291
NCU03183	gene1152	0.54807
NCU03184	gene1154	0.154537
NCU10621	gene1155	0.559599
NCU03186	gene1156	0.222749
NCU03187	gene1157	0.225271
NCU03188	gene1158	0.616256
NCU03189	gene1159	1.55491
NCU03190	gene1160	1.57643
NCU03191	gene1161	0.165442
NCU03192	gene1162	0.16924
NCU03193	gene1163	0.101968
NCU03194	gene1164	0.300701
NCU03195	gene1165	0.280478
NCU11252	gene1166	0.0885281
NCU11251	gene1167	0.0934834
NCU03197	gene1168	0.441326
NCU03198	gene1169	2.07972
NCU03199	gene1170	0.100305
NCU03200	gene1171	0.133894
NCU03202	gene1172	0.584937
NCU03203	gene1173	0.331451
NCU03204	gene1174	1.91979
NCU03205	gene1175	0.609214
NCU03206	gene1176	0.0796771
NCU03207	gene1177	0.211836
NCU03208	gene1178	1.50419
NCU03209	gene1179	0.364796
NCU03210	gene1180	0.167166
NCU03211	gene1181	0.237289
NCU03212	gene1182	0.130058
NCU03213	gene1183	1.62503
NCU03214	gene1184	0.321248
NCU03215	gene1185	0.301834
NCU03216	gene1186	0.147495
NCU03217	gene1187	0.139558
NCU03218	gene1188	0.24936
NCU03219	gene1189	0.484247
NCU03220	gene1190	0.467993
NCU03221	gene1191	0.25209
NCU03222	gene1192	0.492642
NCU03223	gene1193	0.182674
NCU11249	gene1194	0.429881
NCU11248	gene1195	0.252137
NCU03225	gene1196	0.247583
NCU03226	gene1197	0.140886
NCU03228	gene1199	2.22958
NCU03229	gene1202	0.466717
NCU03230	gene1203	0.281106
NCU03231	gene1204	0.169078
NCU03232	gene1205	0.14654
NCU03233	gene1206	0.303539
NCU03234	gene1207	0.295432
NCU03235	gene1208	0.665613
NCU03237	gene1209	0.143348
NCU03238	gene1210	0.120977
NCU03239	gene1211	0.166903
NCU03240	gene1212	0.970028
NCU16390	gene1213	0.430597
NCU03241	gene1214	0.718953
NCU03242	gene1215	3.18254
NCU03243	gene1216	0.205197
NCU03244	gene1217	0.222862
NCU03245	gene1218	0.15519
NCU03246	gene1219	0.399871
NCU03247	gene1220	2.801
NCU03248	gene1221	1.42094
NCU03250	gene1222	2.33725
NCU03253	gene1223	0.197214
NCU03254	gene1224	0.336632
NCU16391	gene1225	0.426035
NCU03255	gene1226	1.09458
NCU03257	gene1227	0.290723
NCU03258	gene1228	0.175701
NCU03260	gene1229	0.124191
NCU16392	gene1230	NA
NCU03261	gene1231	0.0957933
NCU03263	gene1232	0.326864
NCU03264	gene1233	0.0881517
NCU03265	gene1234	0.133286
NCU03266	gene1235	0.289228
NCU03267	gene1236	0.110638
NCU03268	gene1237	0.230928
NCU03269	gene1238	0.216547
NCU03270	gene1239	0.326646
NCU03271	gene1240	0.37787
NCU03273	gene1241	0.822805
NCU03274	gene1242	0.300011
NCU03275	gene1243	0.572812
NCU03276	gene1244	0.0873662
NCU03277	gene1245	0.175315
NCU03278	gene1246	0.146846
NCU03279	gene1247	1.2627
NCU03280	gene1248	0.360131
NCU03281	gene1249	0.67417
NCU03282	gene1251	0.47568
NCU03283	gene1252	0.262512
NCU03284	gene1253	0.230142
NCU03285	gene1254	0.0801861
NCU03286	gene1255	2.26194
NCU03287	gene1256	1.57733
NCU03288	gene1257	0.857981
NCU16394	gene1258	0.24363
NCU03289	gene1259	0.152596
NCU03290	gene1260	0.339407
NCU03291	gene1261	0.2617
NCU03292	gene1262	0.224533
NCU11246	gene1263	0.198565
NCU03293	gene1265	0.872051
NCU03294	gene1266	0.886157
NCU03295	gene1267	1.76465
NCU03296	gene1268	0.128272
NCU03297	gene1269	0.850763
NCU10810	gene1270	0.16239
NCU03298	gene1271	0.218629
NCU03299	gene1272	0.258621
NCU03300	gene1273	0.0956213
NCU10506	gene1274	0.681945
NCU10507	gene1275	2.14114
NCU03302	gene1276	0.505356
NCU03303	gene1277	0.194821
NCU03304	gene1278	0.166941
NCU03305	gene1279	0.473002
NCU03306	gene1280	0.210796
NCU03307	gene1281	2.32293
NCU03308	gene1282	0.428172
NCU03309	gene1283	0.174154
NCU03310	gene1284	0.204007
NCU03311	gene1285	0.0680394
NCU03312	gene1286	0.208851
NCU03313	gene1287	0.980352
NCU03314	gene1288	0.136572
NCU03315	gene1289	0.0748659
NCU03316	gene1290	0.352902
NCU03317	gene1291	0.227316
NCU03318	gene1292	1.00464
NCU03319	gene1293	0.622348
NCU03320	gene1294	0.23472
NCU03321	gene1295	0.865623
NCU03322	gene1296	2.00685
NCU03323	gene1297	0.77813
NCU03325	gene1298	0.45804
NCU09105	gene1299	3.87697
NCU08919	gene1300	0.2078
NCU09107	gene1301	0.111894
NCU09108	gene1302	0.414916
NCU09109	gene1304	0.492366
NCU09111	gene1305	0.133699
NCU09112	gene1306	0.23507
NCU16396	gene1307	0.303151
NCU16397	gene1308	0.172956
NCU10852	gene1309	0.974641
NCU09115	gene1310	0.477126
NCU09116	gene1311	1.09438
NCU09117	gene1313	0.204198
NCU09118	gene1314	0.162282
NCU09119	gene1315	0.139083
NCU09120	gene1316	0.144533
NCU09121	gene1317	0.153508
NCU09122	gene1318	0.269765
NCU09123	gene1319	0.170226
NCU09124	gene1320	0.453367
NCU09125	gene1321	1.25235
NCU16398	gene1322	0.606747
NCU09126	gene1323	2.09959
NCU09127	gene1324	0.136855
NCU09128	gene1325	0.108641
NCU09129	gene1326	0.394141
NCU09130	gene1327	0.133685
NCU09131	gene1328	0.834344
NCU09132	gene1329	0.143394
NCU09133	gene1330	0.307703
NCU09134	gene1331	0.475258
NCU09135	gene1332	0.21064
NCU09136	gene1333	0.227808
NCU09137	gene1334	0.506562
NCU09138	gene1335	0.54241
NCU09139	gene1336	0.151998
NCU09140	gene1337	0.477635
NCU09141	gene1338	2.10225
NCU09142	gene1339	0.154686
NCU09143	gene1340	0.207691
NCU09144	gene1341	0.80201
NCU08391	gene1342	0.329256
NCU08390	gene1343	1.53869
NCU08389	gene1344	0.487423
NCU08388	gene1345	0.202332
NCU08387	gene1346	0.405541
NCU08386	gene1347	0.434311
NCU08385	gene1348	0.195488
NCU08384	gene1349	2.48799
NCU08383	gene1350	1.01076
NCU08382	gene1351	0.552714
NCU08380	gene1352	0.161102
NCU08379	gene1353	0.486053
NCU08378	gene1354	0.358088
NCU16399	gene1355	0.118109
NCU08377	gene1356	0.256977
NCU08376	gene1357	0.199854
NCU16400	gene1358	0.127089
NCU08375	gene1359	0.324276
NCU08374	gene1360	0.161966
NCU08373	gene1361	0.227025
NCU08372	gene1362	0.792226
NCU08371	gene1363	0.722323
NCU08370	gene1364	0.21696
NCU08369	gene1365	0.232362
NCU08368	gene1366	0.338128
NCU08367	gene1367	0.259223
NCU16402	gene1369	0.843113
NCU08366	gene1370	0.464633
NCU08365	gene1371	0.151579
NCU08364	gene1372	0.588472
NCU08363	gene1373	0.286516
NCU08362	gene1374	0.130846
NCU08361	gene1376	2.43008
NCU08360	gene1377	0.268188
NCU08359	gene1378	0.320619
NCU08358	gene1379	0.577521
NCU16404	gene1380	0.457261
NCU08357	gene1381	0.162578
NCU08356	gene1382	0.688814
NCU08355	gene1383	0.543931
NCU08354	gene1384	0.118271
NCU08353	gene1385	0.206347
NCU11325	gene1386	0.691484
NCU08352	gene1387	0.435017
NCU08351	gene1388	0.85161
NCU08350	gene1389	0.47225
NCU08349	gene1390	2.64604
NCU08348	gene1391	0.107804
NCU08347	gene1392	0.497684
NCU08346	gene1393	0.266304
NCU08345	gene1394	0.211323
NCU08344	gene1395	0.495665
NCU08343	gene1396	0.222993
NCU08342	gene1397	0.179785
NCU08341	gene1398	0.370512
NCU08340	gene1399	0.114179
NCU08339	gene1400	0.123044
NCU08338	gene1401	0.309005
NCU08337	gene1402	2.18594
NCU08336	gene1403	0.341924
NCU11324	gene1404	0.500803
NCU08334	gene1405	0.442209
NCU08333	gene1406	0.573074
NCU08332	gene1407	0.303063
NCU16405	gene1408	0.518779
NCU09191	gene1409	0.169695
NCU09192	gene1410	0.093221
NCU09193	gene1411	1.30706
NCU09194	gene1412	0.258343
NCU09195	gene1413	0.460645
NCU09196	gene1414	1.2772
NCU09197	gene1415	0.797864
NCU09198	gene1416	1.27907
NCU09199	gene1417	0.686088
NCU09200	gene1418	0.155715
NCU09201	gene1420	0.289653
NCU09202	gene1421	0.0915027
NCU09203	gene1422	0.0613447
NCU09204	gene1423	0.187625
NCU09205	gene1424	0.187443
NCU09206	gene1425	0.328955
NCU16406	gene1426	2.50794
NCU09207	gene1428	0.589225
NCU09208	gene1429	0.222724
NCU09209	gene1430	1.26784
NCU09210	gene1431	2.00134
NCU09211	gene1432	2.09172
NCU09212	gene1433	0.143127
NCU09213	gene1434	1.02405
NCU09214	gene1436	0.814882
NCU09215	gene1437	0.1963
NCU09216	gene1438	0.256095
NCU09217	gene1439	0.113624
NCU09218	gene1440	0.253664
NCU09219	gene1441	0.367167
NCU09220	gene1442	0.1994
NCU09221	gene1443	0.103854
NCU09222	gene1444	0.158363
NCU09223	gene1445	1.39679
NCU09224	gene1446	1.02682
NCU09225	gene1447	2.38694
NCU09226	gene1448	0.39465
NCU09227	gene1449	0.249074
NCU09228	gene1450	0.29027
NCU10042	gene1451	0.713428
NCU10043	gene1452	0.134958
NCU10044	gene1453	0.180822
NCU07425	gene1454	0.280115
NCU07424	gene1455	0.510726
NCU07423	gene1456	0.587402
NCU07422	gene1457	0.322233
NCU07421	gene1458	0.082714
NCU07420	gene1459	0.318741
NCU07419	gene1460	0.271916
NCU07418	gene1461	0.201667
NCU07417	gene1462	0.0867715
NCU07416	gene1463	0.269705
NCU07415	gene1464	0.325568
NCU07414	gene1465	0.205159
NCU07413	gene1466	1.15226
NCU07412	gene1467	0.579907
NCU07411	gene1468	0.488172
NCU07410	gene1469	2.08193
NCU07409	gene1470	0.387374
NCU07408	gene1471	0.542397
NCU07407	gene1472	0.334254
NCU07406	gene1473	0.727186
NCU07405	gene1474	0.818901
NCU16408	gene1475	0.901931
NCU07404	gene1476	0.741047
NCU07403	gene1477	0.129583
NCU07402	gene1478	0.235064
NCU07401	gene1479	0.135257
NCU07400	gene1480	0.144796
NCU07399	gene1481	0.103083
NCU07398	gene1482	0.379495
NCU07396	gene1483	0.621417
NCU07395	gene1484	0.529557
NCU07394	gene1485	0.226239
NCU07393	gene1486	0.592737
NCU07392	gene1487	0.492503
NCU07390	gene1488	0.782556
NCU07389	gene1489	0.350934
NCU07388	gene1490	0.422552
NCU07387	gene1491	0.131235
NCU07386	gene1492	0.430488
NCU07385	gene1493	0.655494
NCU07384	gene1494	0.279571
NCU11349	gene1495	0.21854
NCU07383	gene1496	0.192362
NCU07382	gene1497	0.0820584
NCU07381	gene1498	0.139204
NCU07380	gene1499	0.223189
NCU07379	gene1500	0.273405
NCU07378	gene1501	0.630933
NCU16409	gene1502	0.741647
NCU07375	gene1503	0.792727
NCU07374	gene1504	0.248848
NCU07372	gene1505	4.24603
NCU07371	gene1506	2.2416
NCU07370	gene1507	2.8538
NCU07369	gene1508	0.55695
NCU07368	gene1509	0.253835
NCU07367	gene1510	0.172443
NCU07366	gene1511	0.2473
NCU07365	gene1512	0.200065
NCU07364	gene1513	0.115891
NCU07363	gene1514	0.477859
NCU07362	gene1515	0.650453
NCU10658	gene1516	0.28742
NCU07361	gene1517	0.147065
NCU07360	gene1518	0.322396
NCU07359	gene1519	0.246406
NCU07358	gene1520	1.05725
NCU16411	gene1522	1.13827
NCU07355	gene1523	0.295966
NCU07354	gene1524	1.18027
NCU07353	gene1525	0.652346
NCU07352	gene1526	0.887488
NCU07351	gene1527	1.1797
NCU07350	gene1528	NA
NCU07349	gene1530	0.552293
NCU07348	gene1531	0.806786
NCU07347	gene1532	0.183915
NCU07345	gene1533	1.14328
NCU07344	gene1534	0.162398
NCU10702	gene1535	4.04149
NCU09888	gene1537	0.173309
NCU09887	gene1538	0.229231
NCU09886	gene1540	0.6497
NCU09885	gene1541	0.228381
NCU09883	gene1542	0.968788
NCU09882	gene1543	0.378584
NCU09881	gene1544	0.306696
NCU09880	gene1545	0.133585
NCU10125	gene1546	NA
NCU09879	gene1547	0.0908704
NCU09878	gene1548	0.139003
NCU09877	gene1549	0.142904
NCU09876	gene1550	3.22701
NCU09875	gene1551	3.39187
NCU09874	gene1553	0.705724
NCU00995	gene1554	0.765564
NCU00994	gene1555	2.48756
NCU00993	gene1556	0.674351
NCU00992	gene1559	0.8985
NCU00990	gene1560	0.75746
NCU00989	gene1561	1.08136
NCU00988	gene1563	1.09229
NCU00987	gene1564	0.903311
NCU16418	gene1565	2.60417
NCU00986	gene1566	3.27047
NCU00985	gene1567	1.1075
NCU00984	gene1568	1.1884
NCU00983	gene1569	0.247354
NCU16419	gene1570	0.422176
NCU00981	gene1571	0.254292
NCU00980	gene1572	0.248291
NCU00979	gene1573	0.584141
NCU00978	gene1574	0.139382
NCU00977	gene1575	0.435148
NCU00976	gene1577	0.489103
NCU00975	gene1578	0.469571
NCU00974	gene1579	0.236737
NCU00973	gene1580	1.01009
NCU00972	gene1581	1.23674
NCU00971	gene1582	0.379496
NCU00970	gene1583	0.62797
NCU00969	gene1584	0.139208
NCU00968	gene1585	2.14378
NCU00967	gene1586	0.414063
NCU11197	gene1588	0.325634
NCU00966	gene1589	0.16206
NCU00965	gene1590	0.346892
NCU00964	gene1591	0.127518
NCU00963	gene1592	1.19872
NCU00962	gene1593	0.34656
NCU00961	gene1594	0.41434
NCU00960	gene1595	0.719391
NCU00959	gene1596	0.247522
NCU00958	gene1597	0.0756415
NCU00957	gene1598	0.287446
NCU00956	gene1599	0.164584
NCU00955	gene1600	0.810163
NCU00954	gene1601	0.48365
NCU00953	gene1602	0.258429
NCU00952	gene1603	0.369611
NCU00951	gene1604	0.170297
NCU00950	gene1605	0.201008
NCU00949	gene1606	2.01739
NCU00948	gene1607	0.391758
NCU00947	gene1608	2.45849
NCU00946	gene1609	1.68687
NCU00945	gene1610	0.272214
NCU00944	gene1611	0.235761
NCU00943	gene1612	1.30638
NCU10847	gene1613	0.197201
NCU16421	gene1614	NA
NCU16422	gene1615	0.182195
NCU16423	gene1616	0.220695
NCU00941	gene1617	0.338782
NCU00940	gene1618	0.754795
NCU00939	gene1620	0.348031
NCU00938	gene1621	0.213444
NCU00937	gene1622	1.40743
NCU00936	gene1623	0.589358
NCU00935	gene1624	0.438675
NCU00934	gene1625	0.360271
NCU00932	gene1627	2.55598
NCU00931	gene1628	0.613571
NCU00930	gene1629	0.15973
NCU00929	gene1630	0.293896
NCU00928	gene1631	0.535809
NCU00927	gene1632	0.382601
NCU00926	gene1634	0.13957
NCU00925	gene1635	0.949491
NCU00924	gene1636	0.0954993
NCU00923	gene1637	0.159254
NCU10603	gene1638	0.842154
NCU00922	gene1639	1.60549
NCU00921	gene1642	0.193137
NCU00920	gene1643	0.126379
NCU00919	gene1644	0.7419
NCU00918	gene1645	0.2172
NCU00917	gene1646	0.185404
NCU00916	gene1647	0.441746
NCU00915	gene1648	0.531828
NCU00914	gene1649	0.10306
NCU00913	gene1650	0.159544
NCU00912	gene1651	0.32042
NCU00911	gene1652	0.714999
NCU00907	gene1653	0.850325
NCU00906	gene1654	0.412436
NCU00905	gene1655	0.279462
NCU00904	gene1656	0.327461
NCU00903	gene1657	0.206267
NCU00902	gene1658	0.226968
NCU00901	gene1659	0.217306
NCU00900	gene1660	0.177534
NCU00899	gene1661	0.698126
NCU00898	gene1662	0.389375
NCU00897	gene1663	0.291324
NCU00896	gene1664	0.247721
NCU00895	gene1665	0.157243
NCU00894	gene1666	0.285377
NCU00893	gene1667	0.473626
NCU00892	gene1668	0.247358
NCU00891	gene1670	2.07973
NCU00890	gene1671	1.62323
NCU00889	gene1672	0.199636
NCU11196	gene1673	0.547224
NCU11195	gene1674	0.505326
NCU00887	gene1675	0.51129
NCU00886	gene1677	0.385496
NCU00885	gene1678	3.08541
NCU00884	gene1679	0.830922
NCU00883	gene1680	0.31721
NCU00882	gene1681	0.232174
NCU00881	gene1682	0.271661
NCU00880	gene1683	0.208993
NCU00879	gene1684	0.123157
NCU00878	gene1685	1.45957
NCU00877	gene1687	0.789711
NCU00876	gene1688	1.08362
NCU00875	gene1689	0.792532
NCU00874	gene1690	1.00813
NCU00873	gene1691	1.10667
NCU00872	gene1692	0.953103
NCU00871	gene1693	2.04984
NCU00870	gene1694	2.03352
NCU00869	gene1695	0.803316
NCU00868	gene1696	0.972458
NCU00867	gene1697	0.455176
NCU00866	gene1698	1.42064
NCU00865	gene1699	0.763896
NCU00864	gene1700	0.440599
NCU00863	gene1701	0.450493
NCU00862	gene1702	0.441334
NCU00861	gene1704	1.01341
NCU00860	gene1705	0.592271
NCU00859	gene1706	1.53243
NCU00857	gene1707	0.427429
NCU00856	gene1708	0.250975
NCU16430	gene1709	0.271916
NCU00855	gene1710	3.62134
NCU00854	gene1711	0.429978
NCU00853	gene1713	0.439982
NCU10889	gene1714	2.15636
NCU00852	gene1715	2.00542
NCU00851	gene1716	1.44476
NCU00850	gene1717	1.91476
NCU00849	gene1718	0.845626
NCU00848	gene1719	0.915359
NCU00847	gene1720	0.464143
NCU00846	gene1721	0.30674
NCU16432	gene1722	0.350961
NCU00845	gene1723	1.55719
NCU00844	gene1724	1.79223
NCU00843	gene1725	0.28627
NCU00842	gene1727	1.14916
NCU00841	gene1728	2.60085
NCU00840	gene1729	3.41468
NCU00839	gene1730	1.02853
NCU00838	gene1731	0.594519
NCU00837	gene1732	0.152911
NCU00836	gene1733	2.47785
NCU00835	gene1734	0.857502
NCU00834	gene1735	0.678949
NCU00833	gene1736	0.227349
NCU00832	gene1737	0.607744
NCU00831	gene1738	0.660418
NCU00830	gene1739	3.484
NCU00829	gene1740	2.91834
NCU00828	gene1741	0.291735
NCU00827	gene1742	0.289629
NCU00826	gene1743	1.86365
NCU00825	gene1744	0.921519
NCU00824	gene1745	0.416374
NCU00823	gene1746	0.159498
NCU00822	gene1747	3.15585
NCU00821	gene1748	1.13399
NCU00819	gene1749	0.619744
NCU00818	gene1750	0.975473
NCU00817	gene1751	3.28791
NCU00814	gene1753	0.315042
NCU00813	gene1754	0.94482
NCU00812	gene1755	0.221668
NCU00811	gene1756	0.50333
NCU00810	gene1757	0.947874
NCU00809	gene1758	1.10033
NCU00808	gene1759	0.609727
NCU00807	gene1761	1.3594
NCU00806	gene1763	1.75921
NCU00805	gene1765	0.158157
NCU00804	gene1767	0.608606
NCU00803	gene1768	0.701823
NCU00802	gene1769	0.459911
NCU00801	gene1770	1.58191
NCU10770	gene1771	NA
NCU00800	gene1772	1.56048
NCU00799	gene1773	0.178633
NCU00798	gene1774	1.38701
NCU00797	gene1775	0.453774
NCU00796	gene1776	0.45699
NCU00795	gene1777	2.3425
NCU00794	gene1778	0.673773
NCU10894	gene1779	0.664595
NCU00793	gene1780	0.308938
NCU00792	gene1781	0.360774
NCU00790	gene1782	1.32665
NCU10895	gene1783	1.62974
NCU00789	gene1784	0.241281
NCU00788	gene1785	1.05335
NCU00787	gene1786	1.36966
NCU00786	gene1787	1.76492
NCU00784	gene1788	0.393991
NCU00783	gene1789	0.773301
NCU00782	gene1791	1.21635
NCU00781	gene1792	2.30441
NCU00780	gene1793	1.36027
NCU00779	gene1794	4.77602
NCU00778	gene1795	0.514992
NCU00777	gene1796	0.498141
NCU00776	gene1797	2.57157
NCU00775	gene1798	0.281466
NCU00774	gene1799	0.473326
NCU00773	gene1800	1.31782
NCU00772	gene1801	0.12118
NCU00771	gene1802	0.207124
NCU00770	gene1803	0.327373
NCU00768	gene1804	0.330864
NCU16438	gene1805	0.298036
NCU16439	gene1806	2.92838
NCU16440	gene1807	2.51195
NCU00766	gene1808	0.396597
NCU00765	gene1809	1.89253
NCU00764	gene1810	1.89567
NCU00763	gene1811	2.25545
NCU00762	gene1812	2.63496
NCU00761	gene1813	0.945008
NCU00760	gene1814	NA
NCU00759	gene1815	0.175357
NCU00758	gene1816	0.297942
NCU00757	gene1817	1.22653
NCU00756	gene1818	1.24689
NCU00755	gene1819	1.37853
NCU00754	gene1820	2.65409
NCU00753	gene1821	0.0573757
NCU00752	gene1822	0.248066
NCU00751	gene1823	0.654584
NCU11095	gene1824	1.03355
NCU16441	gene1825	0.394721
NCU00749	gene1826	0.402067
NCU00748	gene1827	0.555423
NCU00747	gene1828	1.75773
NCU00746	gene1829	2.69022
NCU00745	gene1830	3.41618
NCU00744	gene1831	0.185938
NCU00743	gene1832	0.294492
NCU00742	gene1833	0.590044
NCU00741	gene1834	0.277421
NCU00740	gene1835	0.420117
NCU00739	gene1836	3.13937
NCU00738	gene1837	0.142627
NCU00737	gene1838	0.12187
NCU00736	gene1839	0.180518
NCU00735	gene1840	0.554548
NCU00734	gene1841	0.237988
NCU00733	gene1842	1.88046
NCU00732	gene1843	2.29138
NCU00730	gene1844	1.02163
NCU00729	gene1845	0.570118
NCU00728	gene1846	0.399271
NCU00727	gene1847	0.292997
NCU00726	gene1848	0.175821
NCU00725	gene1849	0.126603
NCU00724	gene1850	1.9622
NCU00723	gene1851	0.445811
NCU16442	gene1852	0.629087
NCU00722	gene1853	0.384076
NCU00721	gene1854	0.560169
NCU00720	gene1855	0.255106
NCU00719	gene1856	1.34126
NCU00718	gene1857	0.445909
NCU10793	gene1858	0.613315
NCU00717	gene1859	0.577178
NCU00716	gene1861	2.3254
NCU00715	gene1862	0.455569
NCU16443	gene1863	0.728548
NCU00714	gene1864	0.163029
NCU00713	gene1865	0.744141
NCU00712	gene1866	0.233428
NCU00711	gene1867	0.587558
NCU00710	gene1868	1.87596
NCU00709	gene1869	2.93483
NCU00708	gene1870	2.14273
NCU00707	gene1871	0.84077
NCU00706	gene1872	0.4256
NCU00705	gene1873	0.908662
NCU00704	gene1874	3.06625
NCU00701	gene1875	1.50767
NCU00700	gene1876	0.522632
NCU00699	gene1877	0.977231
NCU00698	gene1878	0.900084
NCU10264	gene1879	0.406942
NCU00697	gene1880	1.74486
NCU00696	gene1881	0.409459
NCU00695	gene1882	NA
NCU00694	gene1883	0.519058
NCU00693	gene1884	0.192853
NCU00692	gene1885	0.568798
NCU00691	gene1886	0.525014
NCU00690	gene1887	0.132513
NCU00689	gene1888	0.210298
NCU00688	gene1889	0.25427
NCU00687	gene1890	0.154359
NCU00685	gene1891	0.0890786
NCU00684	gene1892	0.908508
NCU00682	gene1893	0.188913
NCU00681	gene1894	0.188651
NCU00680	gene1895	0.860492
NCU00679	gene1896	1.94094
NCU00678	gene1897	0.401487
NCU00677	gene1898	0.739675
NCU16444	gene1899	1.43407
NCU00676	gene1900	0.331068
NCU00675	gene1901	0.214415
NCU00674	gene1902	1.72873
NCU00673	gene1903	0.525109
NCU00671	gene1904	0.23874
NCU00670	gene1905	0.232559
NCU00669	gene1906	0.376057
NCU00668	gene1907	0.124335
NCU00667	gene1908	0.130758
NCU00666	gene1909	0.409978
NCU00665	gene1910	1.99287
NCU00664	gene1911	0.109616
NCU16445	gene1912	1.64909
NCU00663	gene1913	0.291944
NCU00662	gene1914	0.0993224
NCU00660	gene1915	0.191956
NCU00659	gene1916	0.448355
NCU00658	gene1917	0.740202
NCU00657	gene1918	0.139833
NCU00656	gene1919	0.217825
NCU00655	gene1920	0.477473
NCU00654	gene1921	0.21911
NCU00653	gene1922	0.416113
NCU00652	gene1923	0.514164
NCU00651	gene1924	0.520194
NCU00650	gene1925	0.887146
NCU00649	gene1926	0.105099
NCU16446	gene1927	0.201021
NCU00648	gene1928	1.43594
NCU00646	gene1929	0.551303
NCU00645	gene1930	1.29217
NCU00644	gene1931	0.384367
NCU00643	gene1932	2.10635
NCU00642	gene1933	1.26722
NCU00641	gene1934	0.244082
NCU00640	gene1935	0.275021
NCU00638	gene1936	0.614802
NCU00636	gene1937	0.111256
NCU16447	gene1938	NA
NCU00635	gene1939	0.261
NCU00634	gene1940	0.407726
NCU00633	gene1941	0.827763
NCU00632	gene1942	0.100474
NCU00202	gene1943	0.387753
NCU00630	gene1944	0.356831
NCU00629	gene1945	0.367615
NCU00628	gene1946	0.148354
NCU00627	gene1947	0.215379
NCU16448	gene1950	0.0872456
NCU11188	gene1951	0.266738
NCU11187	gene1952	0.216374
NCU00624	gene1953	0.172443
NCU00623	gene1954	0.208502
NCU00622	gene1955	0.185914
NCU00621	gene1956	0.189429
NCU00620	gene1957	0.103403
NCU00619	gene1958	0.130903
NCU00618	gene1959	0.292284
NCU00617	gene1960	0.0840968
NCU00616	gene1961	0.261032
NCU00614	gene1962	0.159645
NCU16449	gene1965	0.904554
NCU00611	gene1966	0.465923
NCU00609	gene1967	0.208217
NCU00608	gene1968	0.676329
NCU00607	gene1969	2.66674
NCU00606	gene1970	1.88053
NCU00605	gene1971	0.248688
NCU00604	gene1972	0.798944
NCU00603	gene1973	2.15963
NCU00602	gene1974	0.561134
NCU00600	gene1975	0.240265
NCU00599	gene1976	0.264477
NCU00598	gene1977	0.386448
NCU00597	gene1978	0.840516
NCU00596	gene1979	0.253221
NCU00595	gene1980	0.224657
NCU00594	gene1981	0.608773
NCU00593	gene1982	0.13864
NCU00592	gene1983	0.135755
NCU00591	gene1984	1.46244
NCU00590	gene1985	0.310069
NCU00589	gene1986	0.298841
NCU00587	gene1987	0.149352
NCU00586	gene1988	0.629127
NCU00585	gene1989	1.34832
NCU00584	gene1990	0.337322
NCU00583	gene1991	2.40704
NCU00582	gene1992	0.99542
NCU00581	gene1993	0.259472
NCU16450	gene1994	0.278382
NCU00580	gene1995	0.440855
NCU00579	gene1996	0.181004
NCU00578	gene1997	0.152892
NCU00577	gene1998	0.104972
NCU00576	gene2000	0.102743
NCU00575	gene2001	0.235295
NCU00574	gene2003	0.67043
NCU00573	gene2004	0.196356
NCU00572	gene2005	1.40422
NCU00571	gene2006	0.0614796
NCU00570	gene2007	0.272991
NCU00569	gene2008	0.109536
NCU00568	gene2009	0.161723
NCU00567	gene2011	0.498015
NCU00566	gene2012	0.0829907
NCU00565	gene2013	0.323542
NCU00564	gene2014	0.119174
NCU00563	gene2015	1.19809
NCU00562	gene2016	0.265989
NCU00561	gene2017	0.683844
NCU00560	gene2018	0.135334
NCU00559	gene2019	1.01036
NCU00558	gene2020	1.37188
NCU16452	gene2021	0.689429
NCU00557	gene2022	0.946494
NCU00556	gene2023	0.248727
NCU16453	gene2024	0.415953
NCU16454	gene2025	0.396161
NCU00554	gene2026	0.48556
NCU00553	gene2027	0.12049
NCU00552	gene2028	1.76292
NCU00551	gene2029	0.305825
NCU00550	gene2030	0.205497
NCU00549	gene2031	0.51198
NCU16455	gene2032	0.269838
NCU11186	gene2033	0.21688
NCU00548	gene2034	0.186279
NCU00547	gene2035	2.6253
NCU00545	gene2037	0.14939
NCU10916	gene2038	0.39847
NCU00542	gene2039	0.26925
NCU00541	gene2040	0.212747
NCU00538	gene2042	0.325592
NCU00537	gene2043	0.329064
NCU00536	gene2044	0.156413
NCU00535	gene2045	0.564206
NCU00534	gene2046	2.02971
NCU00533	gene2047	2.66691
NCU00532	gene2048	2.25456
NCU00531	gene2049	3.81265
NCU00530	gene2050	3.72029
NCU00529	gene2051	2.96882
NCU00528	gene2052	0.12959
NCU00527	gene2053	0.182878
NCU00526	gene2054	1.17021
NCU00525	gene2055	3.80958
NCU00524	gene2056	0.624733
NCU00523	gene2057	0.11902
NCU16457	gene2058	0.337273
NCU00522	gene2059	2.34246
NCU00521	gene2060	0.148684
NCU00520	gene2061	0.451513
NCU00519	gene2062	0.236819
NCU00518	gene2063	0.185473
NCU00517	gene2064	0.124009
NCU00516	gene2065	0.681963
NCU00515	gene2066	0.558851
NCU00513	gene2067	0.224871
NCU00512	gene2068	0.292335
NCU00510	gene2069	0.64267
NCU00509	gene2070	0.916985
NCU00506	gene2072	0.347351
NCU00505	gene2073	0.199008
NCU00504	gene2074	0.132913
NCU00503	gene2075	0.221481
NCU00502	gene2076	0.142624
NCU00501	gene2077	0.543212
NCU00500	gene2078	0.276916
NCU16459	gene2079	0.619484
NCU00499	gene2080	0.714934
NCU16460	gene2081	0.622952
NCU03054	gene2082	0.124733
NCU03053	gene2083	0.163344
NCU03052	gene2084	1.74455
NCU03051	gene2085	0.810733
NCU03050	gene2086	0.117981
NCU03049	gene2087	0.81274
NCU03048	gene2088	0.171894
NCU03047	gene2089	0.138643
NCU11240	gene2090	0.336877
NCU16461	gene2091	1.04923
NCU11241	gene2092	0.448623
NCU03045	gene2093	0.319777
NCU03044	gene2095	1.71488
NCU10772	gene2096	1.19022
NCU03043	gene2097	0.268669
NCU03042	gene2098	0.150184
[truncated: 7,732 more rows]
